# Supplementary material for: A Case Study in Saudi Arabia: Biodiversity of Maize Seed-Borne Pathogenic Fungi in Relation to Biochemical, Physiological, and Molecular Characteristics
Source: MDPI journal article supplement (doi:10.3390/plants11060829), 2022-03-21
Supplement: s1 [file s1]

# A case study in Saudi Arabia: biodiversity of maize seed-borne pathogenic fungi in relation to biochemical, physiological, and molecular characteristics

Abdulaziz A. Al-Askar <sup>1\*</sup>, Khalid M. Ghoneem <sup>2</sup>, Elsayed E. Hafez <sup>3</sup> and WesamEldin I. A. Saber <sup>4\*</sup>

<sup>1</sup> Botany and Microbiology Department, Faculty of Science, King Saud University, Riyadh 11451, Saudi Arabia.

<sup>2</sup> Seed Pathology Research Department, Plant Pathology Research Institute, Agricultural Research Center (ID: 60019332), Giza 12619, Egypt.

<sup>3</sup> Plant Protection and Biomolecular Diagnosis Department, Arid Lands Cultivation Research Institute, City of Scientific Research and Technological Applications, New Borg El-Arab, Alexandria 21934, Egypt.

<sup>4</sup> Microbial Activity Unit, Microbiology Department, Soils, Water and Environment Research Institute, Agricultural Research Center (ID: 60019332), Giza 12619, Egypt.

\* Correspondence: aalaskara@ksu.edu.sa (A.A.A.-A); wesameldin.saber@arc.sci.eg; Tel.: +20-111-173-1062

**Table S1.** Sequences of ITS and RAPD primers that were used in this study.

| Primer name | RAPD Sequence (5→3)  | Annealing temperature |
|-------------|----------------------|-----------------------|
| ITS 1       | TCTGTAGGTGAACCTGCGG  | 51 °C                 |
| ITS 4       | TCCTCCGCTTATTGATATGC |                       |
| RAPD1       | CAGCACCCAC           | 37 °C                 |
| RAPD2       | GGGTAACGCC           |                       |
| RAPD3       | CATCCCCCTG           |                       |
| RAPD4       | CTCACCGTCC           |                       |
| RAPD5       | GACGGATCAG           |                       |
| RAPD6       | CACGAGTCTC           |                       |
| RAPD7       | CCCTACCGAC           |                       |

**Table S2.** GeneBank accession number, and morphological identification of phytopathogenic fungal strains isolated from maize grains.

| Fungus                                  | GeneBank accession number | Colony morphology                                                                                       | Conidiophores                                                                                                                                                                                                               | Conidia                                                                                                                                                                                                                                                                                                                                                                                                                         |
|-----------------------------------------|---------------------------|---------------------------------------------------------------------------------------------------------|-----------------------------------------------------------------------------------------------------------------------------------------------------------------------------------------------------------------------------|---------------------------------------------------------------------------------------------------------------------------------------------------------------------------------------------------------------------------------------------------------------------------------------------------------------------------------------------------------------------------------------------------------------------------------|
| <i>Alternaria alternata</i><br>KSU4M1-1 | MW553174                  | On PDA, colonies are filamentous, growing fast, grey, dark brown, or black.                             | Conidiophores are single or in small groups, straight or curved, sometimes geniculate, 13–59.5 $\mu\text{m}$ $\times$ 2–4.1 $\mu\text{m}$ , with scars.                                                                     | Conidia are ellipsoidal, ovoid, obclavate, obpyriform in chains, 9–13 $\mu\text{m}$ $\times$ 20–36 $\mu\text{m}$ in size, often with a short conical or cylindrical beak 1.7–9.2 $\mu\text{m}$ in diameter tapering to the apex or blunt, about one third or one-quarter of the conidial length. Body with 1–4 transverse septa and 0–2 longitudinal septa, sometimes oblique, in each cell, golden-brown to brown, beak paler. |
| <i>Curvularia lunata</i><br>KSU3M1-1    | MW422773                  | On PDA, colonies effuse brown, blackish-brown or black, hairy, or velvety. Mycelium is mostly immersed. | Conidiophores are solitary or in small groups, simple or branched, straight or flexuous, pale to dark brown, septate, up to 650 $\mu\text{m}$ long, 5–9 $\mu\text{m}$ thick often swollen at the base 10–15 $\mu\text{m}$ . | Conidia acropleurogenous, 3 septate, almost always curved at the third cell from the base which is usually longer and often darker than the others, cell at each end subhyaline or pale brown, intermediate cells mid to dark brown, smooth, 20–32 $\times$ 9–15 $\mu\text{m}$ .                                                                                                                                                |

|                                             |          |                                                                                                                                                                               |                                                                                                                                                                                |                                                                                                                                                                                                                                                                                                                                    |
|---------------------------------------------|----------|-------------------------------------------------------------------------------------------------------------------------------------------------------------------------------|--------------------------------------------------------------------------------------------------------------------------------------------------------------------------------|------------------------------------------------------------------------------------------------------------------------------------------------------------------------------------------------------------------------------------------------------------------------------------------------------------------------------------|
| <i>Curcularia australiensis</i><br>KSU3M2-1 | MW553173 | On PDA, colonies effuse blackish-brown with light gray aerial hyphae, velvety. Hyphae pale to mid-brown, smooth, septate                                                      | Conidiophores are single, flexuous, geniculate, septate, smooth, cylindrical, reddish-brown, up to $235 \times 6-15 \mu\text{m}$ . Conidiogenous cells with verruculose nodes. | Conidia straight, ellipsoidal, or oblong, rounded at the ends, reddish-brown to black-brown, usually 3 or 4-5-distoseptate, $27-43 \times 7.5-10 \mu\text{m}$ , $32 \times 9 \mu\text{m}$ on average.                                                                                                                              |
| <i>Fusarium chlamydosporum</i> KSU1M3-1     | MW422770 | Rapid growing on PDA, reaching 5.5 cm diam in 4 days at $25^\circ\text{C}$ , abundantly developed pink aerial mycelium. Sprodochia are absent. Undersurface is red-vinaceous. | Scattered over the aerial mycelium, richly branched and unbranched polyphialides and monophilides                                                                              | Microconidia abundant, spindle-shape, 0-1 septate, borne usually on polyphilides, fusiform or elongate, $8.5-9.2 \times 2.7-3.0 \mu\text{m}$ . They have a thick wall, and moderately curved. Macroconidia not detected. Chlamydospores numerous, intercalary, roughened, $8.7-16 \mu\text{m}$ .                                   |
| <i>Fusarium proliferatum</i><br>KSU1M2-2    | MW405882 | Rapid growing on PDA, with purple-violet aerial mycelium with age. Sprodochia, absent. The undersurface is generally purple.                                                  | Unbranched and branched polyphialides and monophilides                                                                                                                         | Microconidia are abundant, single-celled, clavate, or pyriform, forming on a long chain and in false heads, $7.6-8.8 \times 2.6-3.1 \mu\text{m}$ . Macroconidia, rarely produced, almost straight, $47-54 \times 3.1-3.5 \mu\text{m}$ . The walls are thin and delicate, and the basal-cell is foot-shaped. Chlamydospores absent. |

|                                          |          |                                                                                                                                                                                                                                                   |                                                                                                                         |                                                                                                                                                                                                                                                                                                                                                                                                                                                                      |
|------------------------------------------|----------|---------------------------------------------------------------------------------------------------------------------------------------------------------------------------------------------------------------------------------------------------|-------------------------------------------------------------------------------------------------------------------------|----------------------------------------------------------------------------------------------------------------------------------------------------------------------------------------------------------------------------------------------------------------------------------------------------------------------------------------------------------------------------------------------------------------------------------------------------------------------|
| <i>Fusarium proliferatum</i> KSU1M2-3    | MW405883 | <p>Rapid growing on PDA, with dense aerial mycelium that is white at first and becomes tan to brown as the culture ages. Orange Sporodochia appears as the culture ages. Undersurface is initial peach color changes to dark brown.</p>           | <p>Unbranched and branched polyphialides and monophialides.</p>                                                         | <p>Macroconidia are only produced, falcate, have 4-7 distinct septa, with a well-developed pedicellate foot cell and attenuated apical cell which curved inwards, <math>45-52 \times 3.7-4.1 \mu\text{m}</math> diameter. Chlamydospores abundant, intercalary, solitary, in chain or knots, globose, <math>6.7-8.6 \mu\text{m}</math> diam.</p>                                                                                                                     |
| <i>Fusarium verticillioides</i> KSU1M1-1 | MW405871 | <p>Rapid growth on PDA, with white aerial mycelium and becomes tinged with purple, 4 cm diam in 4 days at <math>25^{\circ}\text{C}</math>. Orange Sporodochia were present as a pseudo-pionnotal mass. Undersurface is generally dark purple.</p> | <p>Unbranched and branched monophialides, which are occasionally produced in pairs to give a rabbit-ear appearance.</p> | <p>Microconidia are abundant, single-celled, 0 to 1-septate, oval to club-shaped, <math>7-9.7 \times 2.5-3.0 \mu\text{m}</math>, and have a flattened base. They are formed in long chains and false heads. Macroconidia sparse, slightly sickle-shaped to almost straight, 3-5 septa, <math>36-57 \times 2.9-3.6 \mu\text{m}</math>. Apical cells are curved and often tapered to a point, while basal cells are notched or foot-shaped. Chlamydoconidia absent</p> |

|                                          |          |                                                                                                                                                                                                                                                                                                                                                                                                                                                               |                                                                                                                        |                                                                                                                                                                                                                                                                                                                                                                                                                   |
|------------------------------------------|----------|---------------------------------------------------------------------------------------------------------------------------------------------------------------------------------------------------------------------------------------------------------------------------------------------------------------------------------------------------------------------------------------------------------------------------------------------------------------|------------------------------------------------------------------------------------------------------------------------|-------------------------------------------------------------------------------------------------------------------------------------------------------------------------------------------------------------------------------------------------------------------------------------------------------------------------------------------------------------------------------------------------------------------|
| <i>Fusarium verticillioides</i> KSU1M1-2 | MW405884 | <p>Rapid growth on PDA, with white aerial mycelium and becomes tinged with purple, 4 cm diam in 4 days at 25° C. Orange Sporodochia were present as a pseudo-pionnotal mass.</p> <p>Undersurface is generally dark purple.</p> <p>Rapid growth on PDA, with white aerial mycelium and becomes tinged with purple, 4 cm diam in 4 days at 25° C. Orange Sporodochia were present as a pseudo-pionnotal mass.</p> <p>Undersurface is generally dark purple.</p> | <p>Unbranched and branched monophilides, which are occasionally produced in pairs to give a rabbit-ear appearance.</p> | <p>Microconidia are abundant, single-celled, 0 to 1-septate, oval to club-shaped, 7.2 –9.2 × 2.6-3.2 µm, and have a flattened base. They are formed in long chains and false heads. Macroconidia sparse, slightly sickle-shaped to almost straight, 3-5 septa, 35-55 × 3-3.6 µm. Apical cells are curved and often tapered to a point, while basal cells are notched or foot-shaped. Chlamydoconidia absent</p>   |
| <i>Fusarium verticillioides</i> KSU1M1-3 | MW405885 | <p>Rapid growth on PDA, with white aerial mycelium and becomes tinged with purple, 4 cm diam in 4 days at 25° C. Orange Sporodochia were present as a pseudo-pionnotal mass.</p> <p>Undersurface is generally dark purple.</p>                                                                                                                                                                                                                                | <p>Unbranched and branched monophilides, which are occasionally produced in pairs to give a rabbit-ear appearance.</p> | <p>Microconidia are abundant, single-celled, 0 to 1-septate, oval to club-shaped, 7.4 –9.5 × 2.3-3.3 µm, and have a flattened base. They are formed in long chains and false heads. Macroconidia sparse, slightly sickle-shaped to almost straight, 3-5 septa, 39–57 × 2.9-3.6 µm. Apical cells are curved and often tapered to a point, while basal cells are notched or foot-shaped. Chlamydoconidia absent</p> |

|                                          |          |                                                                                                                                                                                                                                                                                                                                                                                                                                                                                                                                                                                                                                                                                                                                                                                                                               |
|------------------------------------------|----------|-------------------------------------------------------------------------------------------------------------------------------------------------------------------------------------------------------------------------------------------------------------------------------------------------------------------------------------------------------------------------------------------------------------------------------------------------------------------------------------------------------------------------------------------------------------------------------------------------------------------------------------------------------------------------------------------------------------------------------------------------------------------------------------------------------------------------------|
| <i>Fusarium verticillioides</i> KSU1M1-4 | MW422779 | <p>Rapid growth on PDA, with white aerial mycelium and becomes tinged with purple, 4 cm diam in 4 days at 25° C. Orange Sporodochia were present as a pseudo-pionnotal mass. Undersurface is generally dark purple.</p> <p>Unbranched and branched monophilides, which are occasionally produced in pairs to give a rabbit-ear appearance.</p> <p>Microconidia are abundant, single-celled, 0 to 1-septate, oval to club-shaped, <math>6.9 - 9.7 \times 2.7 - 3.1 \mu\text{m}</math>, and have a flattened base. They are formed in long chains and false heads. Macroconidia sparse, slightly sickle-shaped to almost straight, 3-5 septa, <math>34 - 58 \times 3.2 - 3.7 \mu\text{m}</math>. Apical cells are curved and often tapered to a point, while basal cells are notched or foot-shaped. Chlamydoconidia absent</p> |
| <i>Sarocladium zeae</i> KSU2M2-1         | MW422774 | <p>Colony growth is slow, flat to very thin cottony, white to pink, reaching 1.8-2.5 cm diameter after 10 days in the dark at 20°C; thin hyphae, producing awl-shaped and erect phialides with a septum at the base, formed singly or in very simple branching conidiophores.</p> <p>Conidiophores usually several times branched, with phialides, up to <math>80 \mu\text{m}</math>, chromophilic at the base, arranged in whorls, and conidia in slimy heads; sclerotia and chlamydospores absent.</p> <p>Conidia unicellular, cylindrical with rounded ends, smooth, hyaline, in slimy heads, mostly <math>3.2 - 5.4 \times 0.9 - 1.7 \mu\text{m}</math>.</p>                                                                                                                                                              |

*Sarocladium zeae* KSU2M2-2

MW422772

Colony growth is slow, flat to very thin cottony, white to pink, reaching 1.7-2.4 cm diameter after 10 days in the dark at 20°C; thin hyphae, producing awl-shaped and erect phialides with a septum at the base, formed singly or in very simple branching conidiophores.

Conidiophores usually several times branched, with phialides, up to 80 µm, chromophilic at the base, arranged in whorls, and conidia in slimy heads; sclerotia and chlamydospores absent.

Conidia unicellular, cylindrical with rounded ends, smooth, hyaline, in slimy heads, mostly  $3.1-5.3 \times 0.9-1.8$  µm

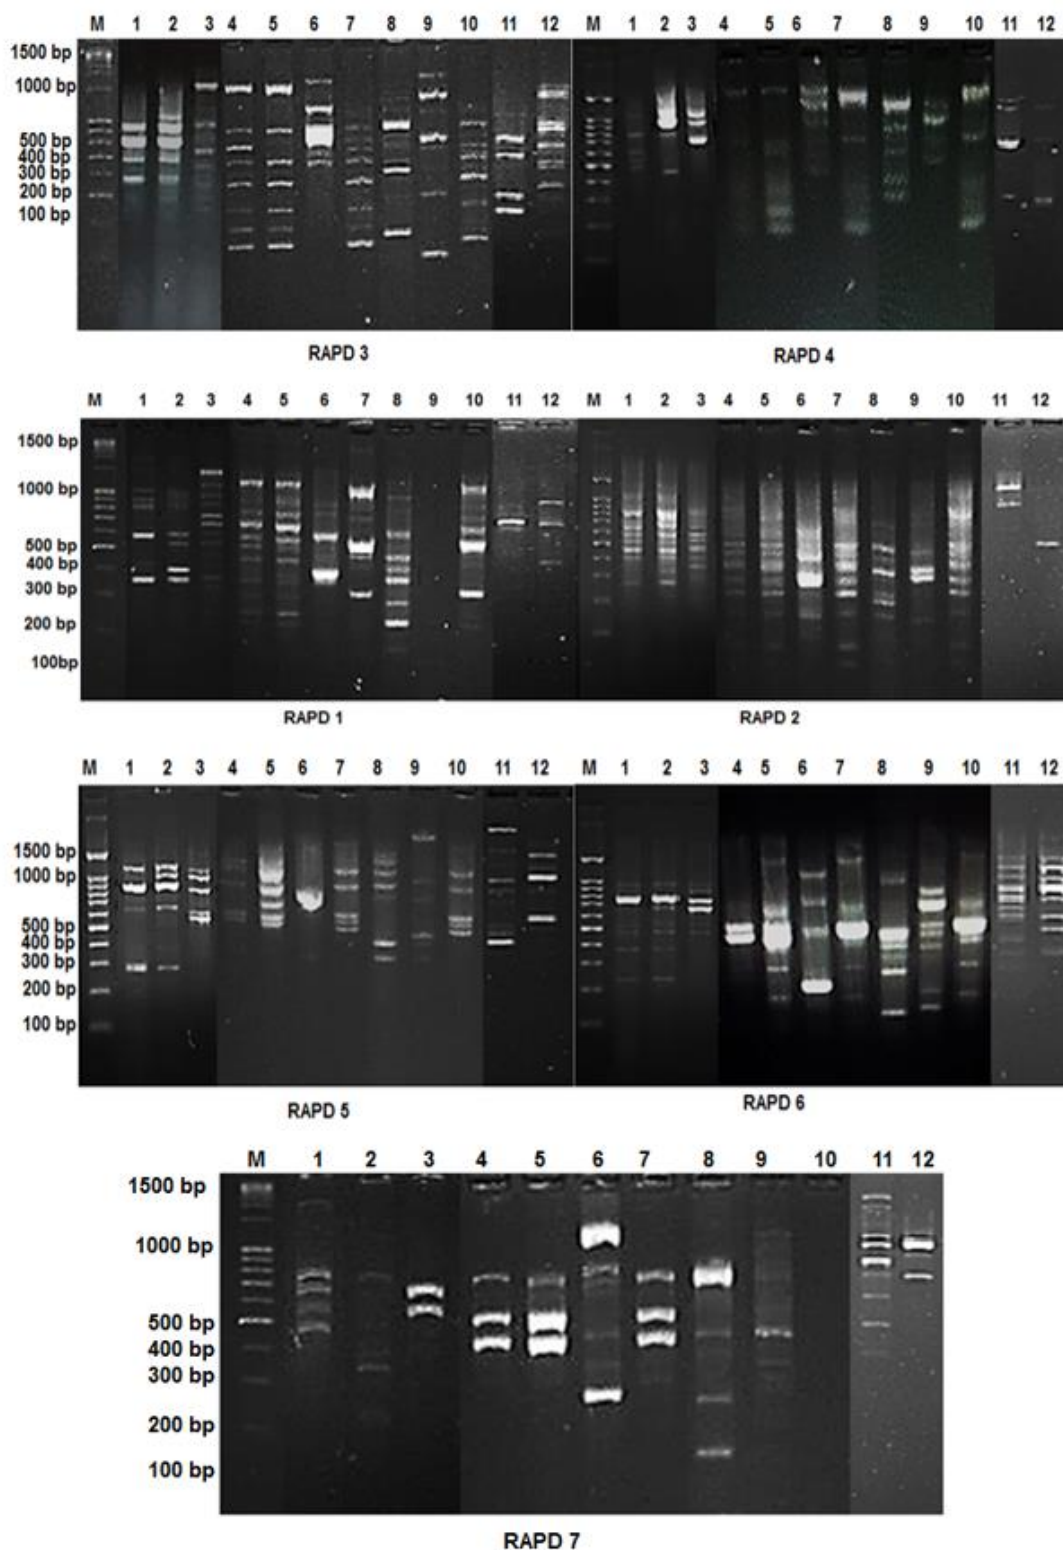

Figure S1. Intra-genotyping among the 12 fungal isolates using RAPD PCR with 7 different arbitrary primers. Lanes; M: 100 bp DNA marker, 1-12 the fungal isolates in sequence; 1: KSU4M1-1; 2: KSU3M2-1; 3: KSU3M1-1; 4: KSU1M3-1; 5: KSU1M2-2; 6:



KSU1M2-3; 7: KSU1M1-1; 8: KSU1M1-2; 9: KSU1M1-3; 10: KSU1M1-4; 11: KSU2M2-1; 12:  
KSU2M2-2.
